# Supplementary material
Source: publisher figshare collection journal article supplement (https://sage.figshare.com/ndownloader/files/12540200)
Supplement: Supplementary file 1 [file 12540200]

Table 2. Excluded studies

| Author      | year | Title                                                                                                                   | Reason for Exclusion      |
|-------------|------|-------------------------------------------------------------------------------------------------------------------------|---------------------------|
| Demiralp B  | 2008 | Total elbow arthroplasty in patients who have elbow fractures caused by gunshot injuries: 8- to 12-year follow-up study | Not management PJI        |
| Gutow AP    | 1994 | Infection following total elbow arthroplasty                                                                            | Narrative review          |
| Iyengar KP  | 2005 | Role of 99mTc Sulesomab in the diagnosis of prosthetic joint infections                                                 | Not specific to the elbow |
| Kwong CA    | 2017 | Fungal periprosthetic joint infection following total elbow arthroplasty: a case report and review of the literature    | Literature review         |
| Linn MS     | 2014 | Is primary elbow arthroplasty safe for the treatment of open intra-articular distal humerus fractures                   | Not treatment PJI         |
| Lui TH      | 2014 | Infected total elbow arthroplasty treated by cemented arthrodesis                                                       | Case report               |
| Malone AA   | 2012 | Revision of total elbow replacement by exchange cementing                                                               | No PJI                    |
| Morman M    | 2011 | Arthroscopic tissue biopsy for evaluation of infection before revision arthroplasty                                     | Not full article          |
| Portillo ME | 2013 | Prosthesis failure within 2 years of implantation is highly predictive of infection.                                    | Includes other joints     |

|             |      |                                                                                                                      |                       |
|-------------|------|----------------------------------------------------------------------------------------------------------------------|-----------------------|
| Poss R      | 1984 | Factors influencing the incidence and outcome of infection following total joint arthroplasty                        | Includes other joints |
| Reilly P    | 2006 | An aid to removal of cement during revision elbow replacement                                                        | Technical note        |
| Sneftrup SB | 2006 | Revision of failed total elbow arthroplasty with use of a linked implant                                             | Not specific to PJI   |
| Stoodley P  | 2008 | Direct demonstration of viable Staphylococcus aureus biofilms in an infected total joint arthroplasty: a case report | Case report           |
| Williams KE | 2017 | An articulating antibiotic cement spacer for first-stage reconstruction for infected total elbow arthroplasty        | Technical note        |
